# Supplementary material
Source: PubMed Central journal article supplement (PMC6776911)
Supplement: EMBR-20-e47840-s001.pdf [file EMBR-20-e47840-s001.pdf]

## Expanded View Figures

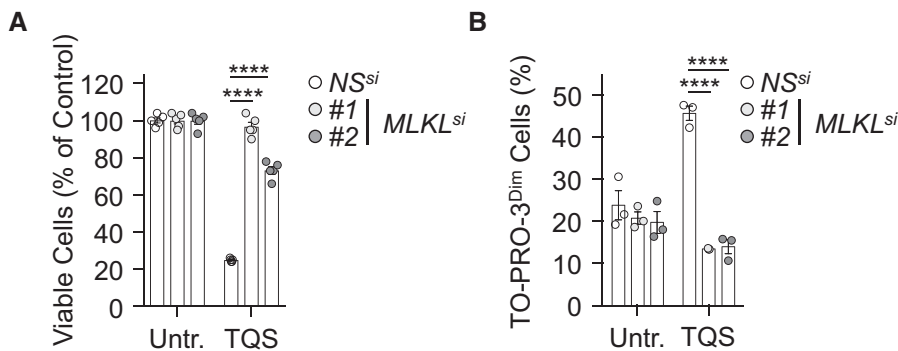

**Figure EV1. Impact of MLKL silencing on cell survival and TO-PRO-3 uptake.**

HT-29 cells were transfected with two individual siRNA for MLKL, or scramble non-specific (NS) siRNA for 72 h. Cells were pre-treated with 10  $\mu$ M QVD-OPH (Q) together with 5  $\mu$ M Birinapant (S), prior stimulation with 10 ng ml<sup>-1</sup> of TNF $\alpha$  (T), as indicated.

A Cell survival was evaluated by CellTiter-Glo after 24 h of treatment. Data are means  $\pm$  SEM,  $n = 4$  biological replicates, \*\*\*\* $P < 0.0001$  (ANOVA).

B TO-PRO-3 uptake was analyzed by flow cytometry in cells treated with TQS for 4 h. Data are means  $\pm$  SEM of three independent experiments. \*\*\*\* $P < 0.0001$  (ANOVA).

**Figure EV2. Uptake of TO-PRO-3 via Pannexin-1 during necroptosis.**

- A HT-29 cells were transfected with a siRNA for PAXN1 (#1), or scramble non-specific (NS) siRNA for 72 h. Cells were pre-treated with 10  $\mu$ M QVD-OPH (Q) together with 5  $\mu$ M Birinapant (S), prior stimulation with 10 ng ml<sup>-1</sup> of TNF $\alpha$  (T), as indicated. Cell lysates were analyzed by Western blotting, as indicated. Molecular weight markers ( $M_r$ ) are shown.
- B Schematic representation of MLKL. The position of the epitopes recognized by the two antibodies used is shown. The star indicates the S358 position.
- C HT-29 cells were treated as indicated. Necrostatin-1 (Nec-1s, 20  $\mu$ M) was also used. Cell lysates were prepared and analyzed by Western blotting. White arrowheads show intact MLKL, and green or red arrowheads show cleaved MLKL.
- D Cells as in (A) were exposed to TQS for 5 h. Necrostatin-1 (Nec-1s, 20  $\mu$ M) was also used. MLKL oligomers (MLKL<sub>n</sub>) were resolved by non-reducing SDS-PAGE after cross-linking.
- E Cell viability assay by CellTiter-Glo in cells treated with TQS for 24 h (mean  $\pm$  SEM,  $n = 9$  biological replicates, \* $P < 0.1$ , \*\* $P < 0.01$ , \*\*\* $P < 0.001$ , \*\*\*\* $P < 0.0001$ , ANOVA).
- F, G Cells were treated with TQS for 4 h, stained with TO-PRO-3 and Annexin V (A5), and analyzed by flow cytometry. Dead cells (TO-PRO-3<sup>high</sup>) were not analyzed. Data are means  $\pm$  SEM of three independent experiments. \* $P < 0.1$ , \*\*\*\* $P < 0.0001$  (ANOVA).
- H, I HT-29 cells were infected with a lentivirus containing a shRNA targeting PAXN1 in the 5'-UTR region. PAXN1 was reintroduced after an infection with a lentivirus containing a PAXN1 cDNA. Cell lysates were analyzed by Western blotting (H). Flow cytometric analysis of cells treated with TQS and cycloheximide for 4 h and stained with TO-PRO-3 (I). Data are means  $\pm$  SEM of three independent experiments. \* $P < 0.1$ , \*\* $P < 0.01$ , \*\*\*\* $P < 0.0001$  (ANOVA).
- J, K TO-PRO-3 uptake was analyzed by flow cytometry (mean  $\pm$  SEM,  $n = 3$  biological replicates, \*\*\*\* $P < 0.0001$ , ANOVA). Gap19 (20  $\mu$ M) and LaCl<sub>3</sub> (1.5 mM) were used.
- L Schematic representation of PAXN1. The position of the epitopes recognized by the antibodies used and the cleavage sites by caspases are shown.
- M Western blotting analysis as indicated. PNGase F was used to remove glycosylation. Open and close symbols represent full-length and cleaved proteins, respectively.
- N Western blotting analysis as indicated. The presented data are representative of at least three independent experiments.

Data information: (A, D) The arrowhead indicates MLKL cleaved fragment. Source data are available online for this figure.

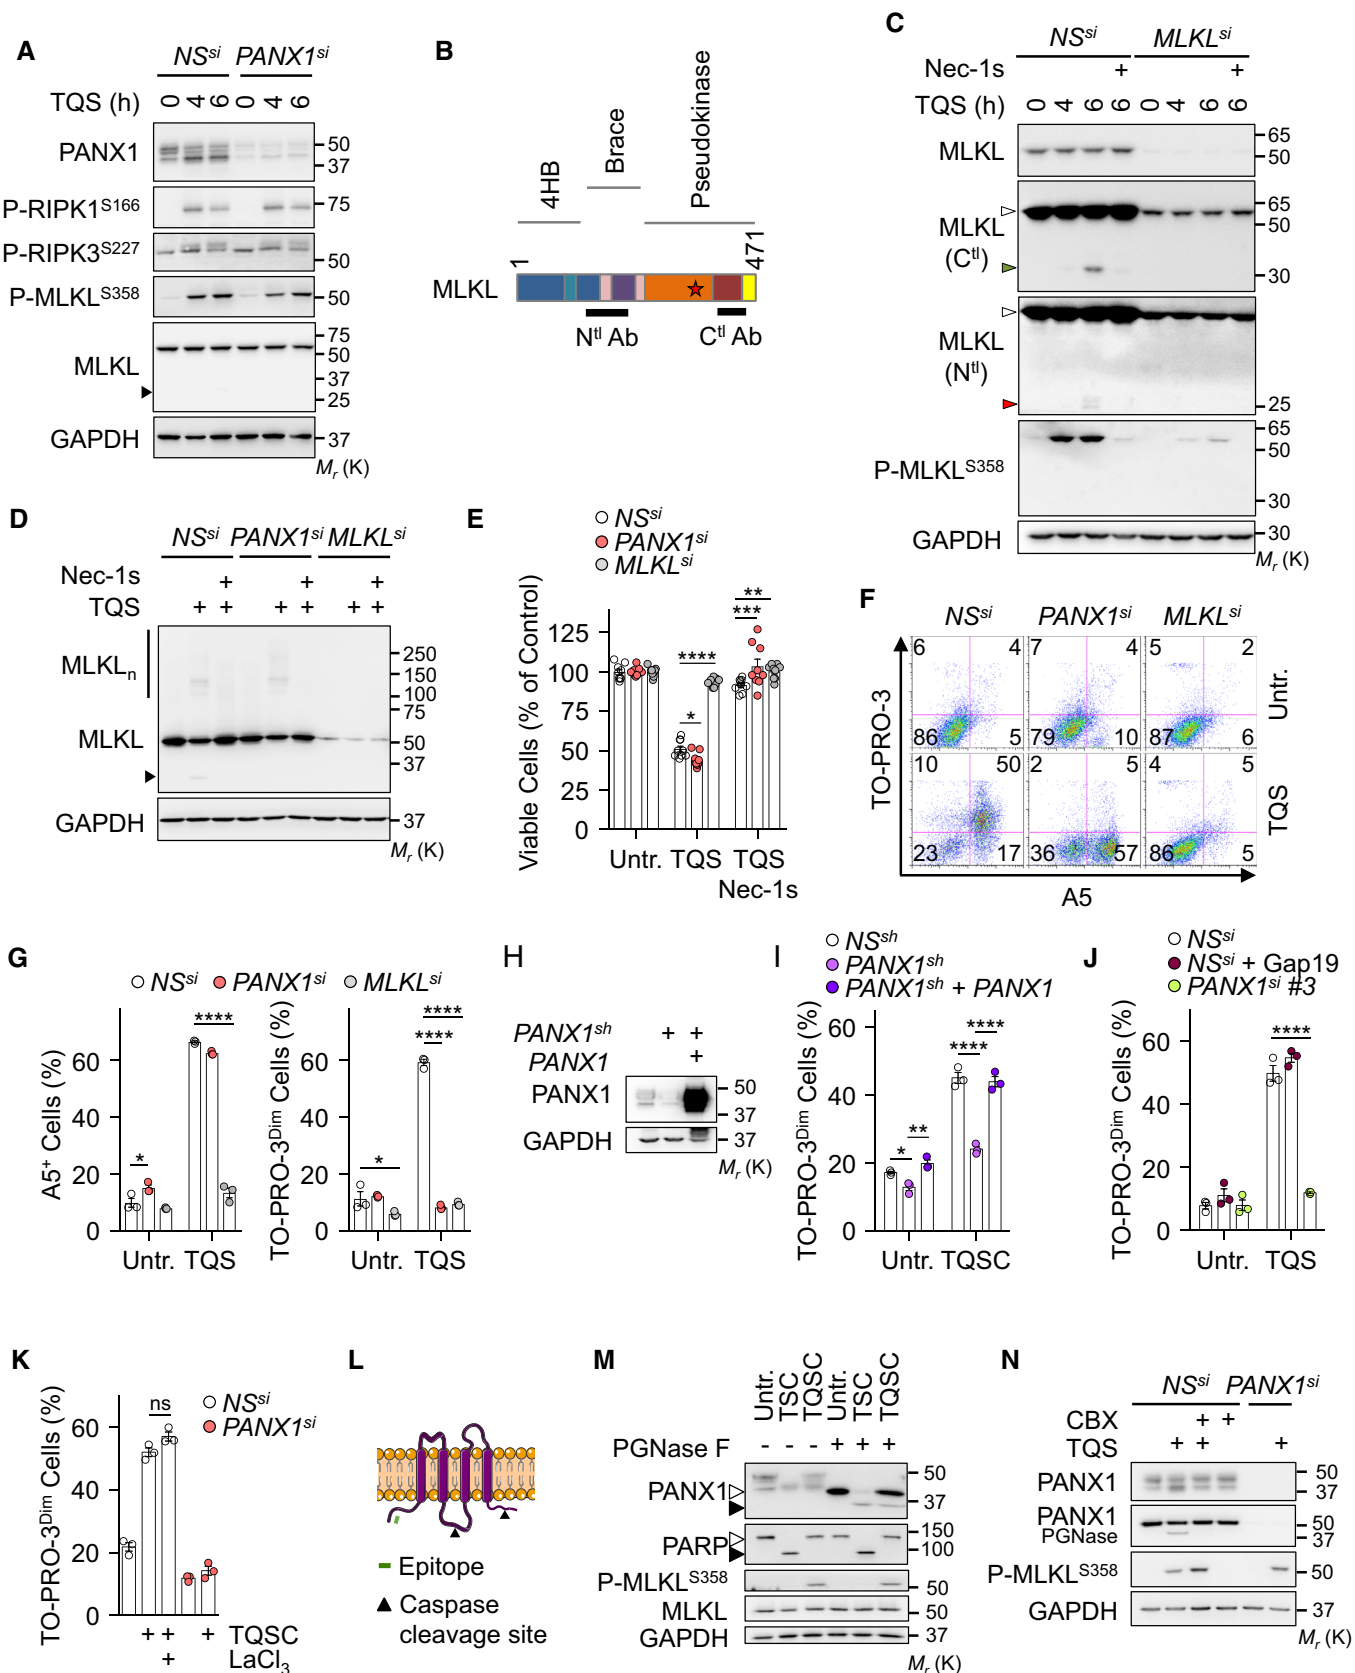

Figure EV2.

**Figure EV3. MLKL controls intracellular vesicles trafficking.**

- A HT-29 cells were transfected with the indicated siRNA for 72 h. Cells were pre-treated with 10  $\mu\text{M}$  QVD-OPh (Q) together with 5  $\mu\text{M}$  Birinapant (S), prior stimulation with 10  $\text{ng ml}^{-1}$  of  $\text{TNF}\alpha$  (T) for 4 h, and TO-PRO-3 uptake was analyzed by flow cytometry. Data are means  $\pm$  SEM of three independent experiments. \* $P < 0.1$ , \*\*\* $P < 0.001$ , \*\*\*\* $P < 0.0001$  (ANOVA).
- B–D Confocal microscopic analysis of CD63 and GM130 in HeLa cells, as indicated. The staining was analyzed by Structure Illumination microscopy (SIM). Nuclei were counterstained with DAPI. Scale bar, 10  $\mu\text{m}$ . The volumes of CD63-positive structures, or scatter plots of numbers and mean volumes of CD63-positive structures analyzed by SIM ( $n = 10$  cells per condition; \*\*\*\* $P < 0.0001$ ; ANOVA), were quantified. Ellipses show 95% confidence. On each box, the central mark indicates the median, and the bottom and top edges of the box indicate the 25<sup>th</sup> and 75<sup>th</sup> percentiles, respectively. The whiskers extend to the most extreme data points not considered outliers.
- E Density plots showing dispersion of the volume of CD63-positive structures for each cells.
- F Flow cytometric analysis of cells treated as in (A) and stained with TO-PRO-3. Shown is mean  $\pm$  SEM ( $n = 3$  biological replicates, \*\*\*\* $P < 0.0001$ , ANOVA).
- G HT-29 cells were transfected with siRNA for MLKL, or scramble non-specific (NS) siRNA for 72 h. Cells were pre-treated with 10  $\mu\text{M}$  QVD-OPh (Q) together with 5  $\mu\text{M}$  Birinapant (S), and with 100  $\mu\text{M}$  CBX, prior stimulation with 10  $\text{ng ml}^{-1}$  of  $\text{TNF}\alpha$  (T) for 6 h. Cell lysates were analyzed by Western blotting as indicated. Molecular weight markers ( $M_r$ ) are shown.
- H HT-29 cells were treated as in (G), and 5  $\mu\text{M}$  NSA was also used. Western blotting analysis was performed with the indicated antibodies.
- I HT-29 cells were transfected with siRNA for MLKL, or scramble non-specific (NS) siRNA for 72 h. Cells were pre-treated with 10  $\mu\text{M}$  QVD-OPh (Q) together with 5  $\mu\text{M}$  Birinapant (S) and KCl, prior stimulation with 10  $\text{ng ml}^{-1}$  of  $\text{TNF}\alpha$  (T) for 4 h. Flow cytometric analysis of cells stained with TO-PRO-3 (mean  $\pm$  SEM,  $n = 5$  biological replicates).
- J Western blotting of cell lysates as in (A). MCC-950 (1  $\mu\text{M}$ ) was also used. The arrowhead indicates MLKL cleaved fragment.

Source data are available online for this figure.

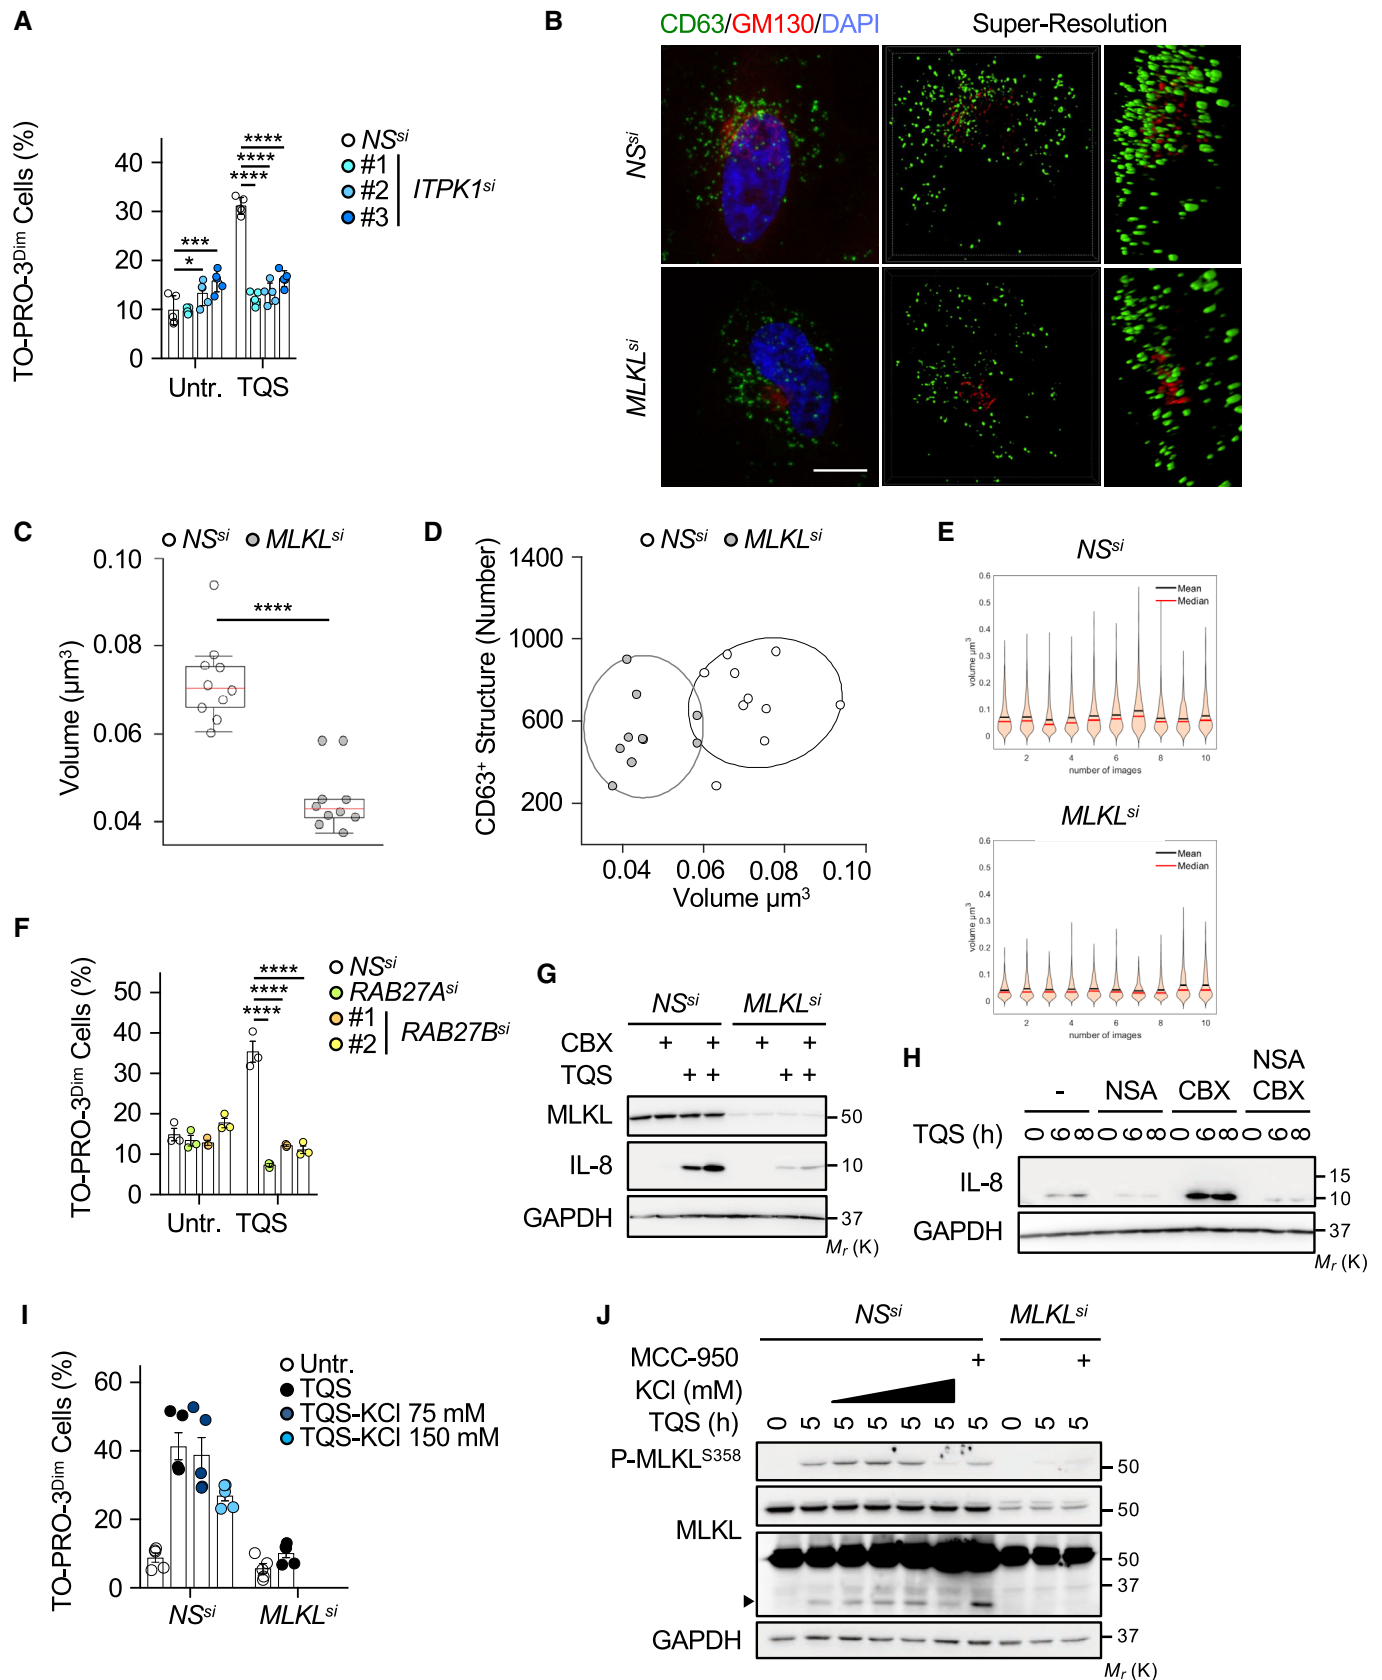

Figure EV3.
