# Supplementary material
Source: PubMed Central journal article supplement (PMC6776911)

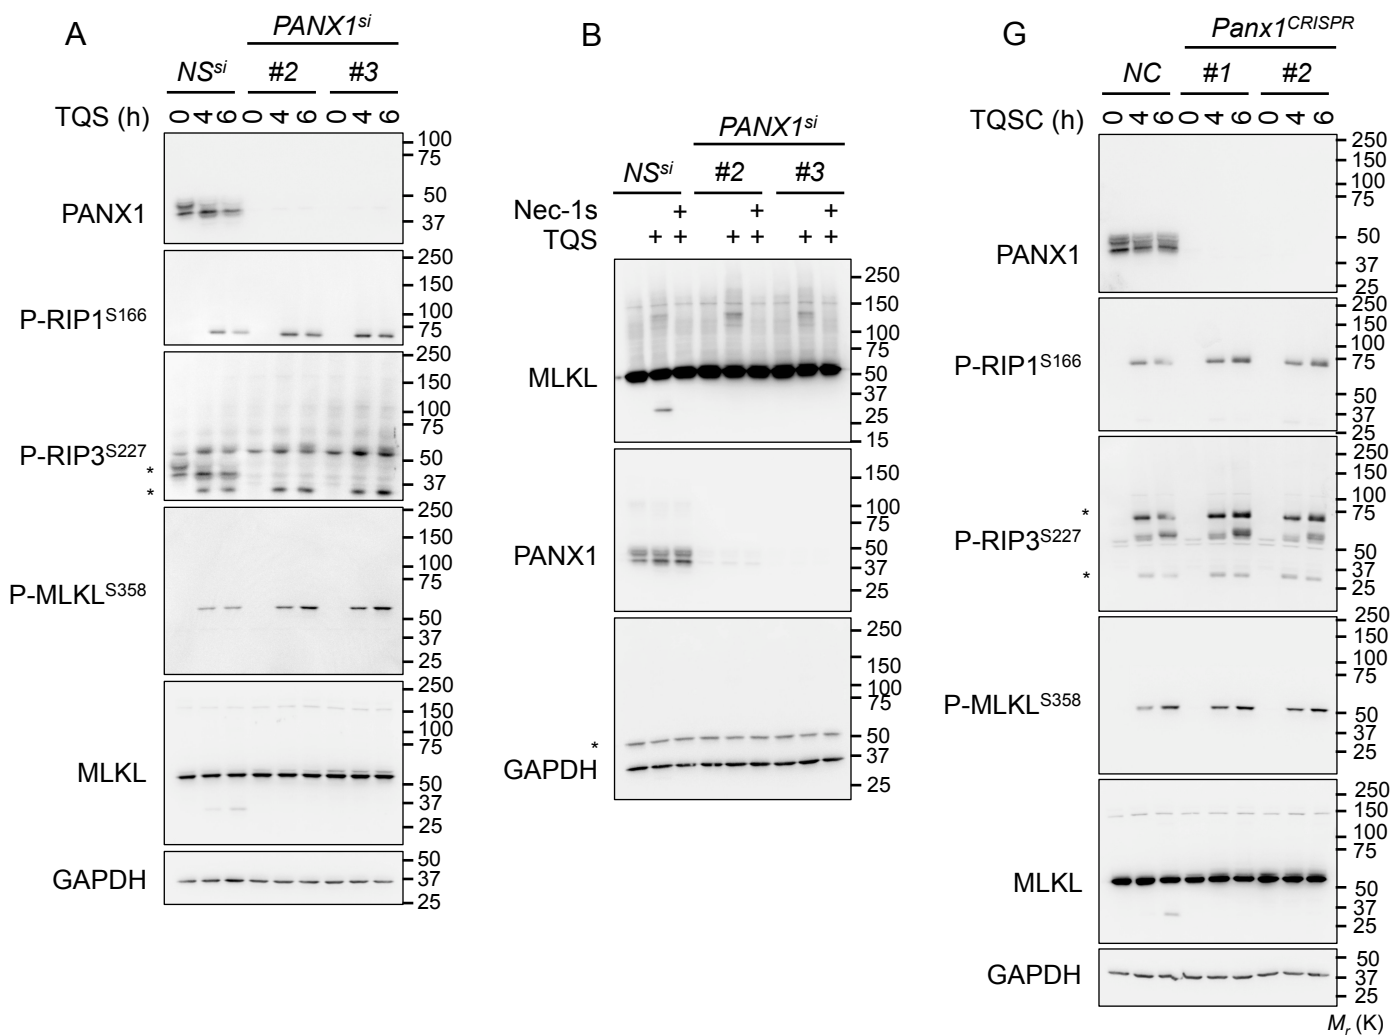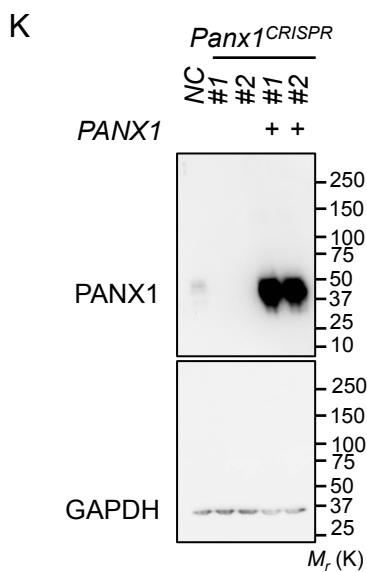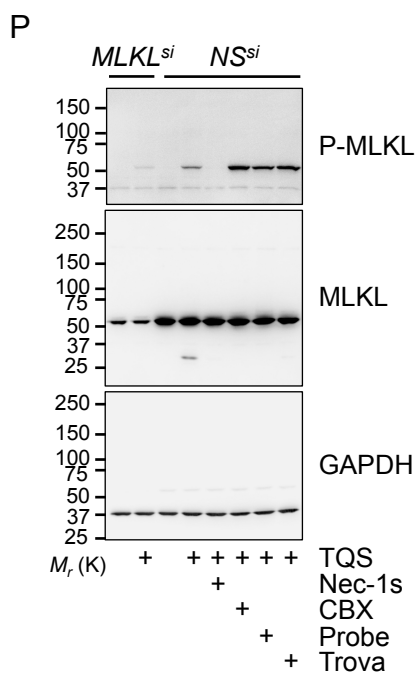

Supplement: EMBR-20-e47840-s004.pdf [file EMBR-20-e47840-s004.pdf]

A

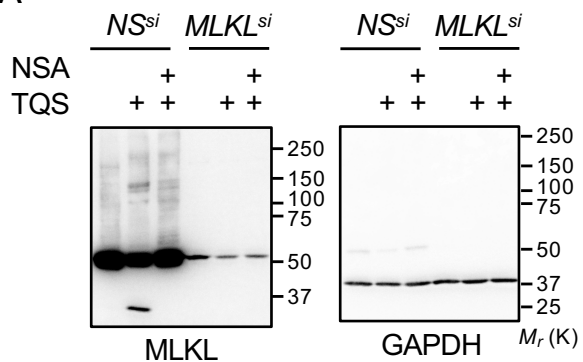

D

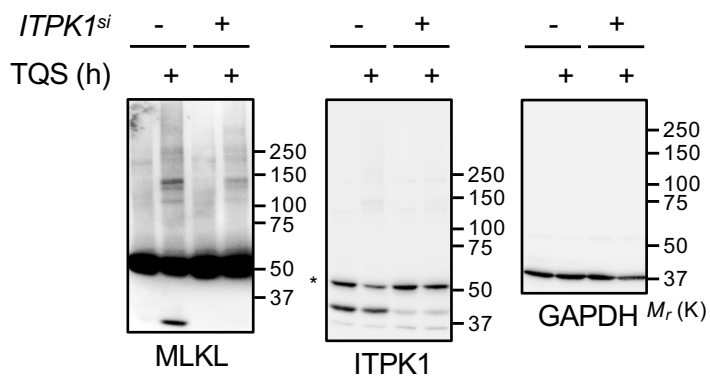

C

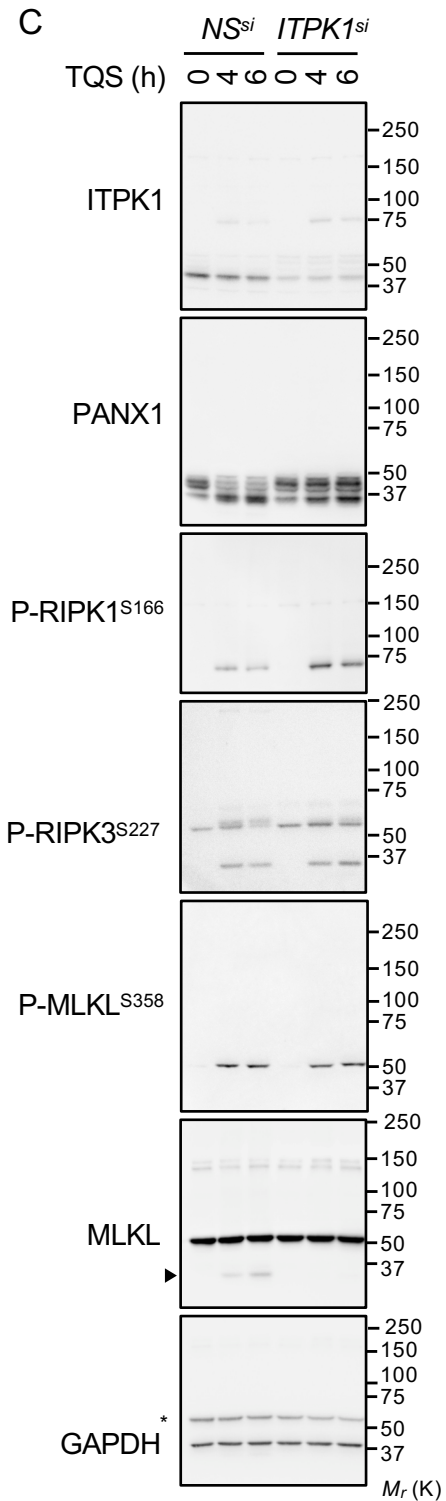

H

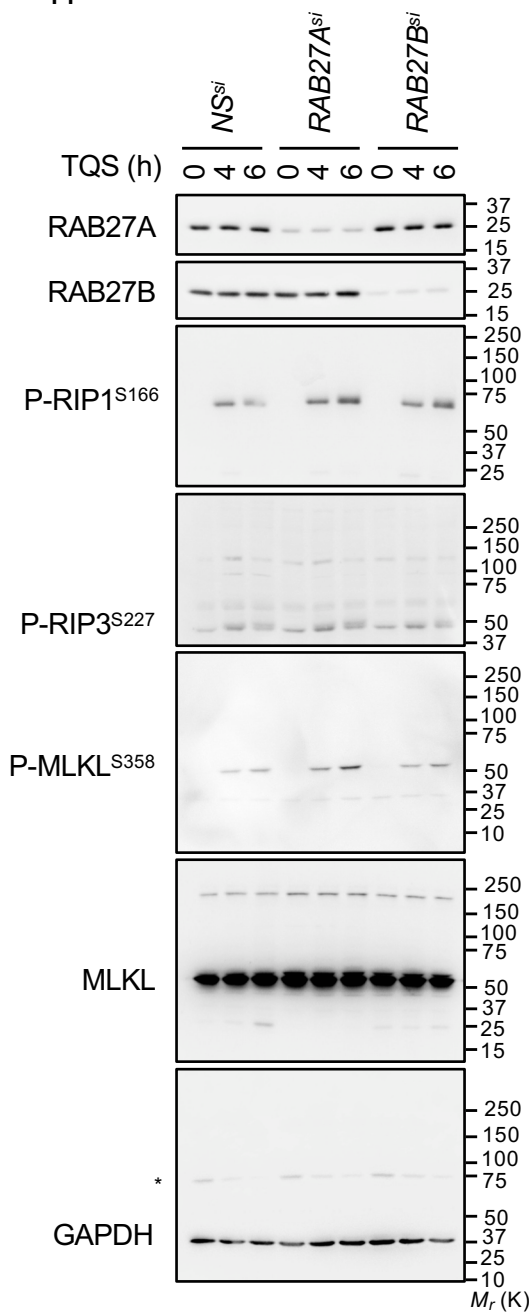

I

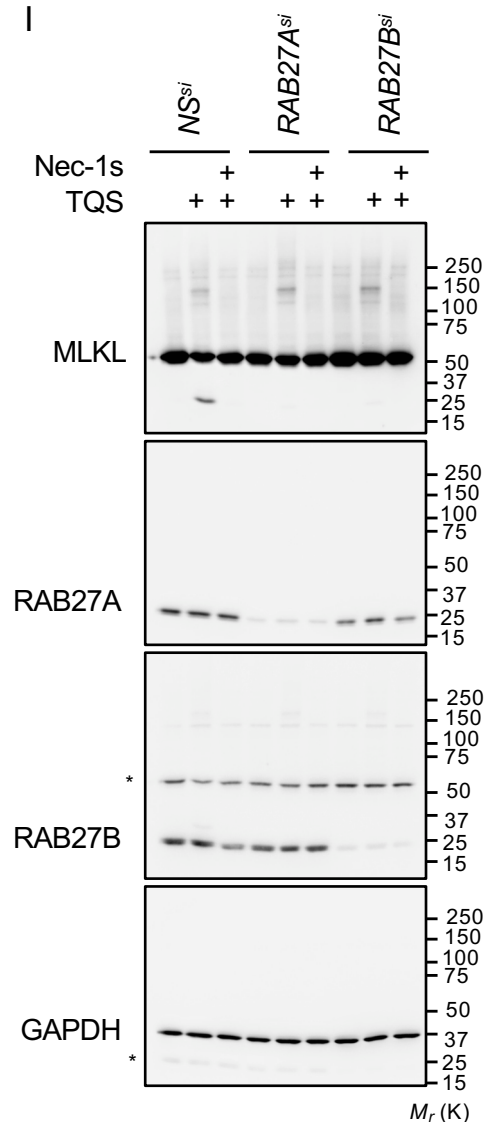

Supplement: EMBR-20-e47840-s005.pdf [file EMBR-20-e47840-s005.pdf]

D

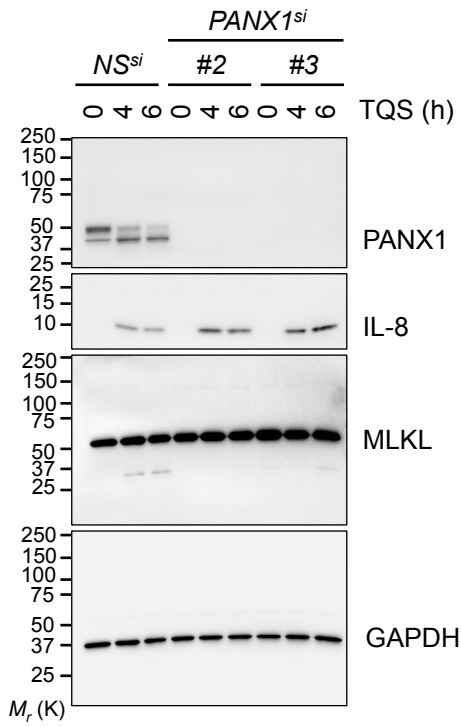

G

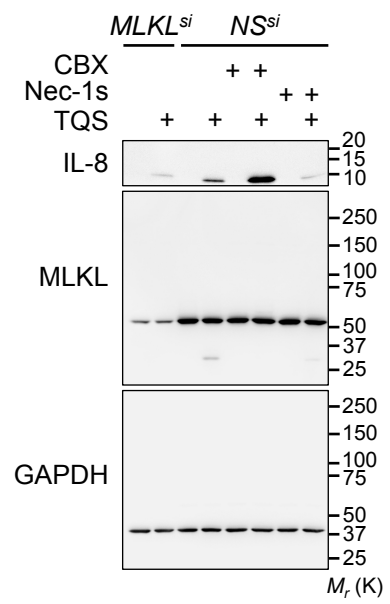

J

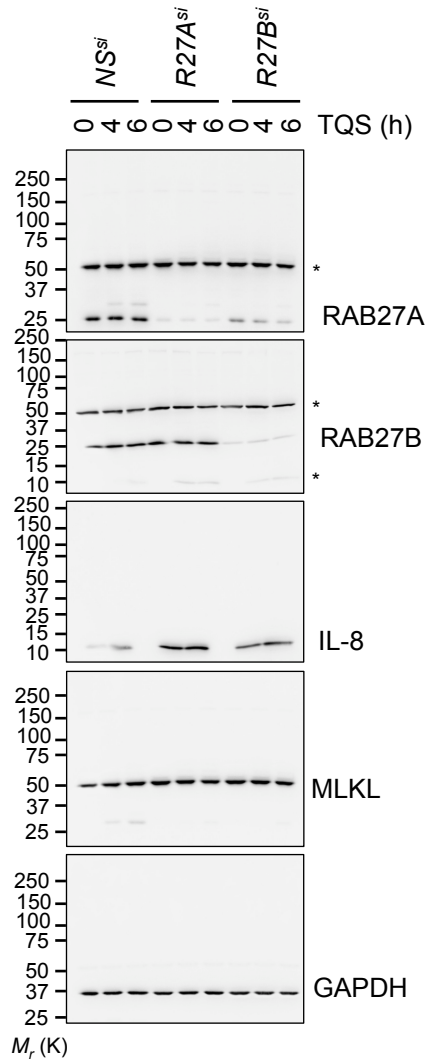

Supplement: EMBR-20-e47840-s006.pdf [file EMBR-20-e47840-s006.pdf]
